# Supplementary material for: High-Throughput RNA Sequencing Analysis of Plasma Samples Reveals Circulating microRNA Signatures with Biomarker Potential in Dengue Disease Progression
Source: PubMed Central journal article supplement (PMC7498686; doi:10.1128/msystems.00724-20), 2020-09-15

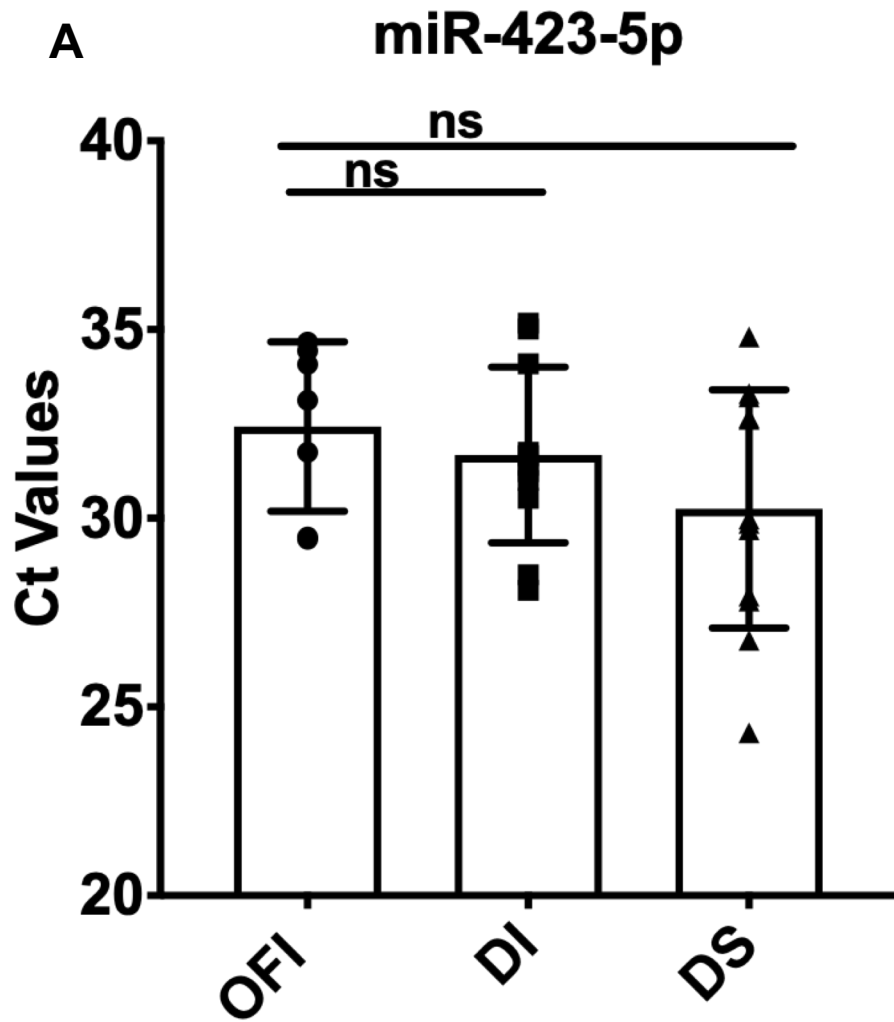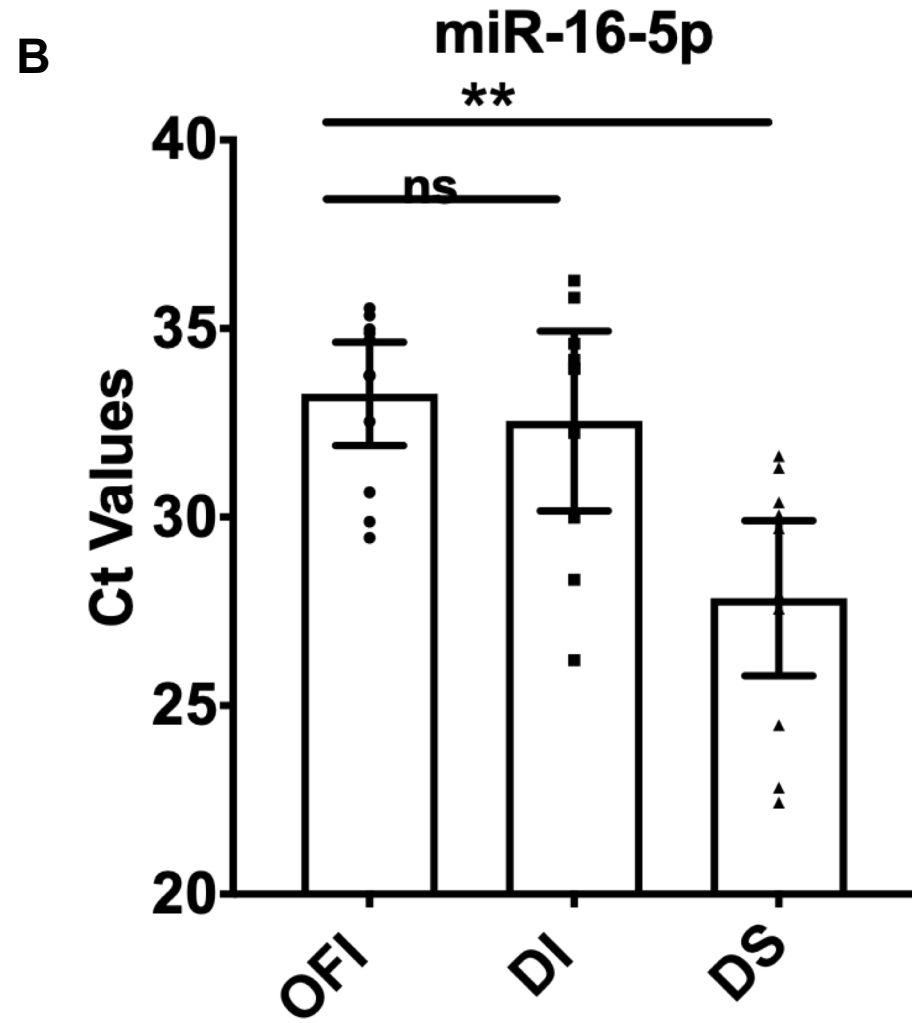

Supplement: mSystems.00724-20-sf001.pdf [file mSystems.00724-20-sf001.pdf]
